# Supplementary material for: Plasmid-Mediated Quinolone Resistance (PMQR) in Two Clinical Strains of Salmonella enterica Serovar Corvallis
Source: MDPI journal article supplement (doi:10.3390/microorganisms10030579), 2022-03-07
Supplement: s1 [file s1]

# Supplementary Materials

**Table S1.** Accession numbers of the genomes and additional information on the *Salmonella enterica* serovar Corvallis ST1541 isolates used for phylogenetic analysis in the present study.

| Isolate     | Genome size (bp) | Origin                       | Country        | Year of isolation | GenBank/ENA accession no. | Reference |
|-------------|------------------|------------------------------|----------------|-------------------|---------------------------|-----------|
| 12-01738    | 4,887,378        | Wild bird                    | Germany        | 2012              | CP027677.1                | [1]       |
| AR-0406     | 4,799,356        | ukn                          | -              | -                 | CP044200.1                | unpub     |
| 2011K-1068  | 4,804,015        | ukn                          | USA            | -                 | MYYS01000001.1            | unpub     |
| 127534      | 4,816,168        | ukn                          | United Kingdom | 2015              | RTAB01000001.1            | unpub     |
| 221702      | 4,752,286        | ukn                          | United Kingdom | 2016              | RSSF01000001.1            | unpub     |
| 399348      | 4,898,914        | ukn                          | United Kingdom | 2017              | RTNL01000001.1            | unpub     |
| BCW_2855    | 4,719,825        | ukn                          | Denmark        | -                 | MXXG01000001.1            | unpub     |
| BCW_2858    | 5,020,070        | ukn                          | Denmark        | -                 | MXXD01000001.1            | unpub     |
| 582263      | 4,767,427        | ukn                          | United Kingdom | 2018              | RURT01000001.1            | unpub     |
| 217077      | 5,015,564        | ukn                          | United Kingdom | 2016              | RUXP01000001.1            | unpub     |
| 140189      | 4,757,520        | ukn                          | United Kingdom | 2015              | AAABOE010000001.1         | unpub     |
| 134263      | 4,842,163        | ukn                          | United Kingdom | 2015              | AAABSC010000001.1         | unpub     |
| 524779      | 4,814,503        | ukn                          | United Kingdom | 2018              | AAACAJ010000001.1         | unpub     |
| 430234      | 4,784,350        | ukn                          | United Kingdom | 2017              | AAACCW010000001.1         | unpub     |
| 296155      | 4,816,897        | ukn                          | United Kingdom | 2016              | AAACFW010000001.1         | unpub     |
| 123935      | 5,040,541        | ukn                          | United Kingdom | 2015              | AAAGCH010000001.1         | unpub     |
| SL_62_S353  | 4,899,668        | Human stool                  | Sri Lanka      | 2016              | SMQT01000001.1            | [2]       |
| SL_39_S118  | 4,860,207        | Human blood                  | Sri Lanka      | 2016              | SMPY01000001.1            | [2]       |
| SL_35_S91   | 4,861,639        | Human stool                  | Sri Lanka      | 2017              | SMPU01000001.1            | [2]       |
| CFSAN079107 | 4,872,954        | Kratom Capsules              | USA            | 2018              | CP042440                  | [3]       |
| SL_29_118   | 4,868,926        | Raw chicken meat             | Sri Lanka      | 2015              | SMPP01000001.1            | [2]       |
| SL_26_115   | 4,990,834        | Raw chicken meat             | Sri Lanka      | 2015              | SMPM01000001.1            | [2]       |
| SL_20_107   | 4,991,033        | Raw chicken meat             | Sri Lanka      | 2015              | SMPG01000001.1            | [2]       |
| SL_17_98    | 4,984,047        | Raw chicken meat             | Sri Lanka      | 2015              | SMPD01000001.1            | [2]       |
| SL_16_97    | 4,992,136        | Raw chicken meat             | Sri Lanka      | 2015              | SMPD01000001.1            | [2]       |
| SL_19_103   | 4,902,599        | Raw chicken meat             | Sri Lanka      | 2015              | SMPF01000001.1            | [2]       |
| Municipal   |                  |                              |                |                   |                           |           |
| HIY0169     | 4,764,495        | wastewater, Sand Island WWTP | USA            | 2010              | VCVD02000001.1            | unpub     |
| 747836      | 4,961,984        | ukn                          | United Kingdom | 2019              | AAFGXP010000001.1         | unpub     |
| 751517      | 5,236,478        | ukn                          | United Kingdom | 2019              | AAFHFR010000001.1         | unpub     |
| 749364      | 4,898,242        | ukn                          | United Kingdom | 2019              | AAFIJA010000001.1         | unpub     |
| 740073      | 4,909,507        | ukn                          | United Kingdom | 2019              | AAFIJW010000001.1         | unpub     |
| 755100      | 4,893,052        | ukn                          | United Kingdom | 2019              | AAFIKN010000001.1         | unpub     |
| 735036      | 4,777,186        | ukn                          | United Kingdom | 2019              | AAFIJB010000001.1         | unpub     |
| Municipal   |                  |                              |                |                   |                           |           |
| HIY0180     | 4,765,527        | wastewater, Sand Island WWTP | USA            | 2010              | VLR01000001.1             | unpub     |
| Municipal   |                  |                              |                |                   |                           |           |
| HIY0041     | 4,684,888        | wastewater, Sand Island WWTP | USA            | 2010              | VLSM01000001.1            | unpub     |
| 508289      | 5,056,816        | ukn                          | United Kingdom | 2018              | AAIJDD010000001.1         | unpub     |

|            |           |                          |       |      |                   |     |
|------------|-----------|--------------------------|-------|------|-------------------|-----|
| NPHL 15376 | 5,013,778 | Human blood              | USA   | 2016 | SPQE01000001.1    | [4] |
| SA1409     | 4,953,145 | Beef from super-market   | China | 2016 | JAEKPE010000001.1 | [5] |
| SA1370     | 4,954,294 | Chicken from wild market | China | 2016 | JAEKPW010000001.1 | [5] |
| SA1369     | 4,958,591 | Chicken from wild market | China | 2016 | JAEKPX010000001.1 | [5] |
| SA1361     | 5,020,005 | Chicken from supermarket | China | 2016 | JAEKQB010000001.1 | [5] |
| SA1318     | 4,960,826 | Chicken from wild market | China | 2016 | JAEKQV010000001.1 | [5] |
| SA292      | 5,015,091 | Chicken from wild market | China | 2015 | JAELMQ010000001.1 | [5] |
| SA1249     | 4,939,320 | Chicken from wild market | China | 2016 | JAEKSN010000001.1 | [5] |

ukn, unknown.

**Table S2.** Pairwise SNP distance matrix calculated from the genomes of two *Salmonella enterica* serovar Corvallis human SNP isolates from a Spanish hospital and 44 isolates from other sources and countries.

|  |             | 12-01738 | 123935 | 127534 | 134263 | 140189 | 2011K-1068 | 217077 | 221702 | 296155 | 399348 | 430234 | 4939320 | 508289 | 524779 | 582263 | 735036 | 740073 | 747836 | 749364 | 751517 | 755100 | AR-0406 | BCW_2855 | BCW_2858 | CFSAN079107 | HIY0041 | HIY0169 | HIY0180 | HUA 5/18 | HUA 6/18 | NPHL_15376 | SA1318 | SA1361 | SA1369 | SA1370 | SA1409 | SA292 | SL_16_97 | SL_17_98 | SL_19_103 | SL_20_107 | SL_26_115 | SL_29_118 | SL_35_S91 | SL_39_S118 | SL_62_S363 |     |    |
|--|-------------|----------|--------|--------|--------|--------|------------|--------|--------|--------|--------|--------|---------|--------|--------|--------|--------|--------|--------|--------|--------|--------|---------|----------|----------|-------------|---------|---------|---------|----------|----------|------------|--------|--------|--------|--------|--------|-------|----------|----------|-----------|-----------|-----------|-----------|-----------|------------|------------|-----|----|
|  | 12-01738    | 13       | 18     | 58     | 39     | 31     | 23         | 102    | 70     | 46     | 105    | 35     | 87      | 149    | 56     | 32     | 51     | 55     | 146    | 50     | 84     | 50     | 22      | 37       | 52       | 52          | 62      | 38      | 36      | 10       | 41       | 33         | 169    | 71     | 169    | 67     | 164    | 44    | 54       | 56       | 39        | 56        | 56        | 57        | 42        | 42         | 39         |     |    |
|  | 123935      | 13       | 18     | 58     | 39     | 31     | 23         | 102    | 70     | 46     | 105    | 35     | 87      | 149    | 56     | 32     | 51     | 55     | 146    | 50     | 84     | 50     | 22      | 37       | 52       | 52          | 62      | 38      | 36      | 10       | 41       | 33         | 169    | 71     | 169    | 67     | 164    | 44    | 54       | 56       | 39        | 56        | 56        | 57        | 42        | 42         | 39         |     |    |
|  | 127534      | 58       | 33     | 94     | 59     | 53     | 59         | 120    | 90     | 22     | 123    | 49     | 105     | 167    | 32     | 54     | 53     | 77     | 170    | 70     | 70     | 202    | 72      | 44       | 39       | 50          | 76      | 84      | 60      | 58       | 62       | 63         | 55     | 93     | 95     | 193    | 191    | 188   | 66       | 74       | 76        | 59        | 76        | 76        | 77        | 62         | 62         | 59  |    |
|  | 134263      | 39       | 94     | 59     | 53     | 59     | 120        | 90     | 22     | 123    | 49     | 105    | 167     | 32     | 54     | 53     | 77     | 170    | 70     | 70     | 202    | 72     | 44      | 39       | 50       | 76          | 84      | 60      | 58      | 62       | 63       | 55         | 93     | 95     | 193    | 191    | 188    | 66    | 74       | 76       | 59        | 76        | 76        | 77        | 62        | 62         | 59         |     |    |
|  | 140189      | 31       | 108    | 53     | 34     | 32     | 97         | 65     | 41     | 100    | 30     | 88     | 144     | 51     | 6      | 46     | 38     | 143    | 45     | 79     | 43     | 6      | 32      | 47       | 49       | 57          | 65      | 41      | 39      | 31       | 137      | 18         | 26     | 166    | 168    | 166    | 164    | 61    | 37       | 49       | 51        | 34        | 51        | 51        | 52        | 37         | 37         | 34  |    |
|  | 2011K-1068  | 23       | 14     | 59     | 40     | 32     | 103        | 71     | 47     | 106    | 36     | 88     | 150     | 57     | 33     | 52     | 56     | 147    | 51     | 85     | 51     | 23     | 38      | 53       | 53       | 63          | 39      | 37      | 41      | 41       | 42       | 34         | 107    | 172    | 170    | 168    | 165    | 45    | 55       | 57       | 40        | 57        | 57        | 58        | 43        | 43         | 40         |     |    |
|  | 217077      | 102      | 77     | 20     | 103    | 97     | 103        | 134    | 108    | 78     | 137    | 67     | 17      | 31     | 18     | 98     | 16     | 21     | 212    | 114    | 66     | 16     | 88      | 99       | 14       | 20          | 28      | 04      | 102     | 206      | 207      | 99         | 237    | 239    | 237    | 235    | 232    | 101   | 18       | 20       | 103       | 120       | 21        | 106       | 106       | 103        |            |     |    |
|  | 221702      | 70       | 27     | 90     | 51     | 65     | 71         | 134    | 108    | 78     | 137    | 67     | 17      | 31     | 18     | 98     | 16     | 21     | 212    | 114    | 66     | 16     | 88      | 99       | 14       | 20          | 28      | 04      | 102     | 206      | 207      | 99         | 237    | 239    | 237    | 235    | 232    | 101   | 18       | 20       | 103       | 120       | 21        | 106       | 106       | 103        |            |     |    |
|  | 296155      | 46       | 21     | 22     | 47     | 41     | 47         | 108    | 78     | 111    | 37     | 37     | 65      | 14     | 42     | 41     | 65     | 158    | 58     | 90     | 60     | 32     | 97      | 27       | 38       | 64          | 72      | 48      | 46      | 52       | 53       | 43         | 81     | 83     | 81     | 79     | 176    | 54    | 62       | 64       | 47        | 64        | 65        | 65        | 50        | 50         | 47         |     |    |
|  | 399348      | 105      | 80     | 23     | 106    | 100    | 106        | 87     | 137    | 111    | 100    | 72     | 114     | 21     | 11     | 16     | 24     | 215    | 17     | 149    | 19     | 32     | 97      | 27       | 38       | 64          | 72      | 48      | 46      | 52       | 53       | 43         | 81     | 83     | 81     | 79     | 176    | 54    | 62       | 64       | 47        | 64        | 65        | 65        | 50        | 50         | 47         |     |    |
|  | 430234      | 35       | 10     | 49     | 36     | 30     | 36         | 97     | 67     | 37     | 100    | 82     | 144     | 47     | 31     | 42     | 54     | 47     | 47     | 79     | 49     | 21     | 28      | 43       | 53       | 61          | 37      | 35      | 61      | 37       | 35       | 61         | 42     | 32     | 170    | 172    | 168    | 165   | 43       | 51       | 53        | 36        | 53        | 53        | 54        | 39         | 39         | 36  |    |
|  | 4939320     | 87       | 162    | 105    | 88     | 82     | 88         | 27     | 119    | 93     | 72     | 82     | 16      | 103    | 83     | 98     | 106    | 97     | 99     | 51     | 101    | 73     | 84      | 99       | 105      | 16          | 89      | 87      | 91      | 82       | 84       | 222        | 224    | 222    | 220    | 217    | 95     | 103   | 105      | 108      | 105       | 106       | 96        | 91        | 91        | 88         | 80         | 80  | 80 |
|  | 508289      | 149      | 224    | 67     | 50     | 144    | 60         | 31     | 81     | 65     | 144    | 16     | 165     | 145    | 160    | 168    | 259    | 61     | 51     | 63     | 135    | 146    | 61      | 67       | 175      | 51          | 49      | 253     | 254     | 146      | 284      | 286        | 284    | 282    | 279    | 57     | 165    | 167   | 60       | 167      | 167       | 168       | 63        | 63        | 63        | 63         | 63         | 63  |    |
|  | 524779      | 56       | 31     | 32     | 57     | 51     | 57         | 118    | 88     | 14     | 21     | 47     | 103     | 165    | 52     | 51     | 75     | 168    | 68     | 200    | 70     | 42     | 37      | 48       | 74       | 82          | 58      | 56      | 62      | 63       | 53       | 91         | 93     | 91     | 89     | 86     | 64     | 72    | 74       | 57       | 74        | 74        | 75        | 60        | 60        | 57         |            |     |    |
|  | 582263      | 32       | 109    | 54     | 35     | 6      | 33         | 98     | 66     | 42     | 41     | 31     | 83      | 165    | 52     | 47     | 39     | 144    | 46     | 80     | 44     | 6      | 33      | 48       | 50       | 58          | 34      | 32      | 138     | 199      | 27       | 67         | 169    | 67     | 165    | 162    | 168    | 50    | 52       | 53       | 52        | 53        | 38        | 38        | 35        |            |            |     |    |
|  | 735036      | 51       | 26     | 53     | 52     | 46     | 52         | 116    | 83     | 41     | 116    | 42     | 98      | 160    | 51     | 47     | 70     | 163    | 63     | 95     | 65     | 37     | 26      | 45       | 69       | 77          | 53      | 51      | 67      | 158      | 48       | 166        | 168    | 166    | 164    | 61     | 59     | 67    | 52       | 59       | 62        | 70        | 55        | 55        | 52        |            |            |     |    |
|  | 740073      | 55       | 32     | 77     | 58     | 38     | 56         | 21     | 89     | 65     | 62     | 54     | 106     | 168    | 75     | 39     | 70     | 167    | 69     | 203    | 67     | 39     | 56      | 71       | 73       | 81          | 57      | 55      | 61      | 62       | 50       | 92         | 190    | 188    | 185    | 61     | 73     | 75    | 58       | 75       | 75        | 76        | 61        | 61        | 58        |            |            |     |    |
|  | 747836      | 146      | 223    | 70     | 149    | 143    | 147        | 212    | 80     | 158    | 215    | 147    | 197     | 259    | 168    | 144    | 163    | 167    | 160    | 294    | 162    | 134    | 167     | 164      | 164      | 70          | 148     | 42      | 43      | 145      | 231      | 233        | 231    | 229    | 226    | 162    | 164    | 166   | 149      | 166      | 167       | 62        | 62        | 62        | 62        | 62         | 62         |     |    |
|  | 749364      | 50       | 105    | 70     | 27     | 45     | 51         | 14     | 62     | 58     | 117    | 47     | 99      | 61     | 68     | 46     | 63     | 69     | 160    | 96     | 64     | 36     | 49      | 64       | 68       | 76          | 52      | 50      | 54      | 65       | 47       | 85         | 87     | 85     | 83     | 108    | 58     | 38    | 40       | 5        | 40        | 41        | 24        | 24        | 27        |            |            |     |    |
|  | 751517      | 84       | 259    | 202    | 185    | 179    | 185        | 166    | 216    | 90     | 149    | 179    | 61      | 51     | 200    | 160    | 195    | 203    | 294    | 96     | 98     | 170    | 81      | 166      | 202      | 210         | 186     | 184     | 288     | 289      | 81       | 319        | 321    | 319    | 317    | 314    | 92     | 200   | 202      | 85       | 202       | 202       | 203       | 188       | 188       | 185        |            |     |    |
|  | 755100      | 52       | 107    | 72     | 53     | 43     | 43         | 116    | 84     | 60     | 119    | 49     | 101     | 163    | 70     | 44     | 65     | 67     | 162    | 64     | 98     | 34     | 51      | 66       | 68       | 76          | 52      | 50      | 56      | 57       | 45       | 85         | 87     | 85     | 83     | 108    | 58     | 68    | 70       | 53       | 70        | 70        | 71        | 56        | 56        | 53         |            |     |    |
|  | AR-0406     | 22       | 99     | 44     | 25     | 6      | 23         | 88     | 56     | 32     | 91     | 21     | 73      | 135    | 42     | 6      | 37     | 39     | 34     | 36     | 70     | 34     | 23      | 38       | 44       | 24          | 22      | 28      | 29      | 17       | 67       | 69         | 67     | 65     | 62     | 28     | 40     | 42    | 25       | 42       | 42        | 43        | 28        | 28        | 25        |            |            |     |    |
|  | BCW_2855    | 12       | 37     | 39     | 38     | 32     | 38         | 99     | 69     | 27     | 102    | 28     | 84      | 146    | 37     | 33     | 26     | 146    | 47     | 49     | 81     | 51     | 32      | 31       | 55       | 63          | 39      | 37      | 41      | 142      | 34       | 172        | 174    | 172    | 170    | 167    | 45     | 53    | 55       | 38       | 55        | 55        | 56        | 41        | 41        | 38         |            |     |    |
|  | BCW_2858    | 52       | 127    | 50     | 53     | 47     | 53         | 114    | 84     | 38     | 117    | 43     | 99      | 61     | 48     | 48     | 45     | 71     | 164    | 64     | 56     | 66     | 38      | 21       | 70       | 78          | 54      | 52      | 58      | 59       | 49       | 87         | 89     | 87     | 85     | 82     | 60     | 68    | 70       | 53       | 70        | 71        | 71        | 56        | 56        | 53         |            |     |    |
|  | CFSAN079107 | 52       | 131    | 76     | 57     | 49     | 53         | 120    | 88     | 64     | 123    | 53     | 105     | 167    | 74     | 50     | 69     | 73     | 164    | 68     | 202    | 68     | 40      | 55       | 70       | 80          | 56      | 54      | 58      | 59       | 51       | 87         | 89     | 87     | 85     | 82     | 62     | 72    | 74       | 57       | 74        | 74        | 75        | 60        | 60        | 57         |            |     |    |
|  | HIY0041     | 62       | 139    | 84     | 65     | 57     | 63         | 128    | 94     | 72     | 73     | 61     | 113     | 175    | 82     | 58     | 77     | 81     | 174    | 76     | 210    | 76     | 48      | 63       | 78       | 80          | 50      | 48      | 148     | 149      | 59       | 97         | 99     | 97     | 95     | 92     | 70     | 80    | 82       | 65       | 82        | 83        | 68        | 68        | 65        |            |            |     |    |
|  | HIY0169     | 38       | 16     | 60     | 41     | 33     | 39         | 104    | 72     | 48     | 70     | 37     | 89      | 61     | 58     | 34     | 53     | 57     | 50     | 52     | 86     | 52     | 24      | 39       | 54       | 56          | 50      | 2       | 144     | 45       | 35       | 173        | 175    | 173    | 171    | 168    | 46     | 56    | 58       | 41       | 58        | 58        | 58        | 44        | 44        | 41         |            |     |    |
|  | HIY0180     | 36       | 13     | 58     | 39     | 31     | 37         | 102    | 70     | 46     | 105    | 35     | 87      | 149    | 56     | 32     | 51     | 55     | 148    | 50     | 84     | 50     | 22      | 37       | 52       | 54          | 48      | 2       | 42      | 43       | 33       | 171        | 173    | 171    | 169    | 166    | 44     | 54    | 56       | 39       | 56        | 56        | 57        | 42        | 42        | 39         |            |     |    |
|  | HUA 5/18    | 147      | 216    | 62     | 143    | 137    | 141        | 206    | 174    | 152    | 209    | 141    | 91      | 253    | 162    | 138    | 57     | 61     | 42     | 154    | 288    | 56     | 128     | 141      | 158      | 158         | 168     | 144     | 142     | 1        | 139      | 225        | 227    | 225    | 223    | 220    | 146    | 158   | 160      | 143      | 160       | 160       | 161       | 146       | 146       | 143        |            |     |    |
|  | HUA 6/18    | 141      | 218    | 63     | 144    | 138    | 142        | 207    | 175    | 163    | 210    | 142    | 92      | 254    | 163    | 138    | 57     | 62     | 43     | 155    | 289    | 67     | 129     | 142      | 158      | 159         | 169     | 145     | 143     | 1        | 140      | 226        | 228    | 226    | 224    | 221    | 147    | 159   | 161      | 144      | 161       | 161       | 162       | 147       | 147       | 144        |            |     |    |
|  | NPHL_15376  | 33       | 10     | 55     | 36     | 26     | 34         | 99     | 67     | 43     | 102    | 32     | 84      | 146    | 53     | 27     | 48     | 50     | 145    | 47     | 81     | 45     | 17      | 34       | 49       | 51          | 59      | 35      | 33      | 39       | 40       | 68         | 70     | 168    | 166    | 163    | 39     | 51    | 53       | 36       | 53        | 53        | 54        | 39        | 39        | 36         |            |     |    |
|  | SA1318      | 169      | 248    | 93     | 174    | 166    | 170        | 237    | 205    | 81     | 240    | 70     | 222     | 284    | 197    | 67     | 186    | 90     | 231    | 85     | 39     | 85     | 67      | 127      | 87       | 87          | 97      | 173     | 171     | 225      | 226      | 168        | 10     | 0      | 0      | 0      | 6      | 25    | 179      | 189      | 91        | 174       | 91        | 91        | 92        | 177        | 177        | 174 |    |
|  | SA1361      | 171      | 250    | 95     | 176    | 168    | 172        | 239    | 207    | 183    | 242    | 172    | 224     | 286    | 193    | 169    | 188    | 92     | 233    | 187    | 321    | 87     | 159     | 174      | 189      | 189         | 199     | 175     | 173     | 227      | 228      | 170        | 0      | 0      | 0      | 8      | 27     | 81    | 91       | 93       | 176       | 193       | 193       | 94        | 179       | 179        | 176        |     |    |
|  | SA1369      | 169      | 248    | 93     | 174    | 166    | 170        | 237    | 205    | 81     | 240    | 70     | 222     | 284    | 197    | 67     | 186    | 90     | 231    | 85     | 39     | 85     | 67      | 127      | 87       | 87          | 97      | 173     | 171     | 225      | 226      | 168        | 0      | 0      | 0      | 6      |        |       |          |          |           |           |           |           |           |            |            |     |    |
